# Supplementary material for: Whole-Genome Sequencing of Lactiplantibacillus plantarum YY-112 and Investigation of Its Immune-Modulating Abilities In Vivo
Source: MDPI journal article supplement (doi:10.3390/fermentation9120996), 2023-11-23
Supplement: s1 [file s1]

**Table S1.** General genome features of *L. plantarum* YY-112

|                               | 112_chr   | 112_plasmid1 | 112_plasmid2 |
|-------------------------------|-----------|--------------|--------------|
| Sequence length (bp)          | 3,346,642 | 72,756       | 22,510       |
| G+C content (%)               | 44.53     | 39.51        | 36.2         |
| ORF number                    | 3174      | 83           | 27           |
| ORF total length (bp)         | 2808279   | 54693        | 18060        |
| ORF density (genes per kb)    | 0.948     | 1.141        | 1.199        |
| Longest ORF length (bp)       | 9810      | 2190         | 1845         |
| ORF average length (bp)       | 884.78    | 658.95       | 668.89       |
| Intergenic region length (bp) | 538363    | 18063        | 4450         |
| ORF/Genome (%)                | 83.91     | 75.17        | 80.23        |
| rRNA                          | 16        | 0            | 0            |
| tRNA                          | 69        | 0            | 0            |
| ncRNA                         | 158       | 2            | 0            |

ORF total length: the number of bases occupied by ORF; ORF density: gene coding density (the number of genes present per 1kb base); ORF / Genome (coding percentage): ratio of total ORF length to genome length.

**Table S2.** Distribution of virulence factors in *L. plantarum* YY-112

| VFDB name | ORF name    | Related genes                                       | Product                                        | VF category                         |
|-----------|-------------|-----------------------------------------------------|------------------------------------------------|-------------------------------------|
| VF0244    | chr_646     | hasC [Streptococcus pyogenes M1 GAS]                | UTP--glucose-1-phosphate uridylyltransferase   | Immune modulation; Antiphagocytosis |
| VF0074    | chr_669     | clpP [Listeria monocytogenes EGD-e]                 | ATP-dependent Clp protease proteolytic subunit | Stress survival                     |
| VF0361    | chr_996     | cpsI [Enterococcus faecalis V583]                   | UDP-galactopyranose mutase                     | Immune modulation; Antiphagocytosis |
| VF0323    | chr_996     | glf [Campylobacter jejuni subsp. jejuni NCTC 11168] | UDP-galactopyranose mutase                     | Immune modulation; Antiphagocytosis |
| VF0361    | chr_1040    | cpsI [Enterococcus faecalis V583]                   | UDP-galactopyranose mutase                     | Immune modulation; Antiphagocytosis |
| VF0073    | chr_1085    | clpE [Listeria monocytogenes EGD-e]                 | ATP-dependent protease                         | Stress survival                     |
| VF0361    | chr_1799    | cpsA [Enterococcus faecalis V583]                   | undecaprenyl diphosphate synthase              | Immune modulation; Antiphagocytosis |
| VF0350    | chr_3052    | bsh [Listeria monocytogenes EGD-e]                  | bile salt hydrolase                            | Stress survival                     |
| VF0274    | plasmid1_64 | cpsF [Streptococcus agalactiae 2603V/R]             | polysaccharide biosynthesis protein CpsF       | Immune modulation; Antiphagocytosis |

**Table S3.** Distribution of CAZymes in *L. plantarum* YY-112

| Class                     | Family                                                              | Gene                                                                                                                                                                                                                   |
|---------------------------|---------------------------------------------------------------------|------------------------------------------------------------------------------------------------------------------------------------------------------------------------------------------------------------------------|
| Glycoside<br>Hydrolases   | GH13                                                                | chr_152, chr_157, chr_166, chr_169, chr_18,<br>chr_2041, chr_228, chr_23, chr_2369,<br>chr_2764, chr_3134                                                                                                              |
|                           | GH1                                                                 | chr_2388, chr_2389, chr_2596, chr_2695,<br>chr_3039, chr_3042, chr_3043, chr_3122,<br>chr_389, chr_773                                                                                                                 |
|                           | GH25                                                                | chr_1215, chr_1559, chr_2116, chr_2417,<br>chr_2663, chr_2795, chr_577, chr_583, chr_980<br>chr_2249, chr_2251, chr_3106, chr_3107,                                                                                    |
|                           | GH109                                                               | chr_3109, chr_3111, chr_693, chr_962,<br>chr_983; plasmid1_33                                                                                                                                                          |
|                           | GH65                                                                | chr_1526, chr_159, chr_26, chr_3046                                                                                                                                                                                    |
|                           | GH73                                                                | chr_2276, chr_2710, chr_963                                                                                                                                                                                            |
|                           | GH78                                                                | chr_3001, chr_3003                                                                                                                                                                                                     |
|                           | GH2; GH20; GH31;<br>GH32; GH36; GH38;<br>GH42; GH85; GH92;<br>GH125 | chr_3012; chr_3138; chr_3050; chr_164;<br>chr_3014; chr_3124; chr_2999; chr_160;<br>chr_3127; chr_3125                                                                                                                 |
| Glycosyl<br>Transferases  | GT2                                                                 | chr_1004, chr_1018, chr_1038, chr_1039,<br>chr_1267, chr_1352, chr_1613, chr_1816,<br>chr_1840, chr_1880, chr_2333, chr_234,<br>chr_2393, chr_365, plasmid1_51, plasmid1_72<br>chr_1002, chr_1015, chr_1016, chr_1089, |
|                           | GT4                                                                 | chr_1090, chr_1109, chr_1116, chr_1118,<br>chr_1842, chr_1843, chr_2112, chr_2286,<br>chr_2445, chr_2446                                                                                                               |
|                           | GT28                                                                | chr_1922, plasmid1_65                                                                                                                                                                                                  |
|                           | GT51                                                                | chr_1244, chr_1545                                                                                                                                                                                                     |
|                           | GT5; GT14; GT26; GT32;<br>GT35                                      | chr_21; chr_2115; chr_481; plasmid1_66;<br>chr_22                                                                                                                                                                      |
| Carbohydrate<br>Esterases | CE1                                                                 | chr_1553, chr_2267, chr_2288, chr_2546,<br>chr_2937, chr_3033, chr_729                                                                                                                                                 |
|                           | CE10                                                                | chr_2524, chr_835, chr_854                                                                                                                                                                                             |
|                           | CE2; CE3; CE4; CE9;<br>CE12                                         | chr_2972; chr_1642; chr_2094; chr_479;<br>chr_578                                                                                                                                                                      |
|                           | AA6                                                                 | chr_211, chr_2475, chr_2482, chr_828                                                                                                                                                                                   |
| Auxiliary<br>Activities   | AA3                                                                 | chr_1253, chr_330, chr_944                                                                                                                                                                                             |
|                           | AA1-3; AA4; AA10                                                    | chr_317; chr_254; chr_1501                                                                                                                                                                                             |

|                                     |              |                                                                                              |
|-------------------------------------|--------------|----------------------------------------------------------------------------------------------|
| Carbohydrate-<br>Binding<br>Modules | CBM50        | chr_1657, chr_1897, chr_2447, chr_2448,<br>chr_2599, chr_2600, chr_265, chr_266,<br>chr_2962 |
|                                     | CBM22; CBM40 | chr_1209; chr_2588                                                                           |
| Polysaccharide<br>Lyases            | PL3_1        | chr_2762                                                                                     |

---

**Table S4.** Genomic characterization of strain YY-112, selected *L. plantarum* and *L. pentosus*

| Organism            | Sample Name     | Strain       | CDS No. | Chromosome Size (Mb) | G+C content of chromosome (%) |
|---------------------|-----------------|--------------|---------|----------------------|-------------------------------|
| <i>L. pentosus</i>  | YY-112          | YY-112       | 3343    | 3.346642             | 44.53                         |
|                     | GCF_002211885.1 | SLC13        | 3154    | 3.52051              | 46.49                         |
|                     | GCF_003627295.1 | ZFM222       | 3273    | 3.564857             | 46.40                         |
|                     | GCF_003627375.1 | ZFM94        | 3252    | 3.564833             | 46.40                         |
|                     | GCF_003641185.1 | DSM 20314    | 3272    | 3.622107             | 46.41                         |
|                     | GCF_016804305.1 | MS031        | 3402    | 3.805124             | 46.07                         |
|                     | GCF_022701335.1 | KZ0310       | 3469    | 3.873381             | 46.00                         |
|                     | GCF_025398935.1 | Jan-68       | 3148    | 3.482151             | 46.53                         |
|                     | GCF_026222675.1 | OHF 23       | 3212    | 3.622037             | 46.41                         |
|                     | GCF_004028315.1 | 13_3         | 3087    | 2.991504             | 44.85                         |
| <i>L. plantarum</i> | GCF_004028335.1 | 12_3         | 3235    | 3.213344             | 44.61                         |
|                     | GCF_004101505.1 | SRCM103357   | 3307    | 3.277486             | 44.60                         |
|                     | GCF_004101545.1 | SRCM103361   | 3077    | 3.163668             | 44.71                         |
|                     | GCF_019076805.1 | XJ25         | 2919    | 3.169974             | 44.69                         |
|                     | GCF_019399915.1 | 41P          | 3075    | 3.210905             | 44.64                         |
|                     | GCF_019425695.1 | DW12         | 2942    | 3.217574             | 44.63                         |
|                     | GCF_029637825.1 | SPC-SNU-72-1 | 3116    | 3.129268             | 44.72                         |

Organism: species name; Sample Name: sample name; Strain: strain number; CDS No.: number of CDS; Chromosome Size (Mb): size of chromosome; GC content of chromosome (%): GC content of chromosome.

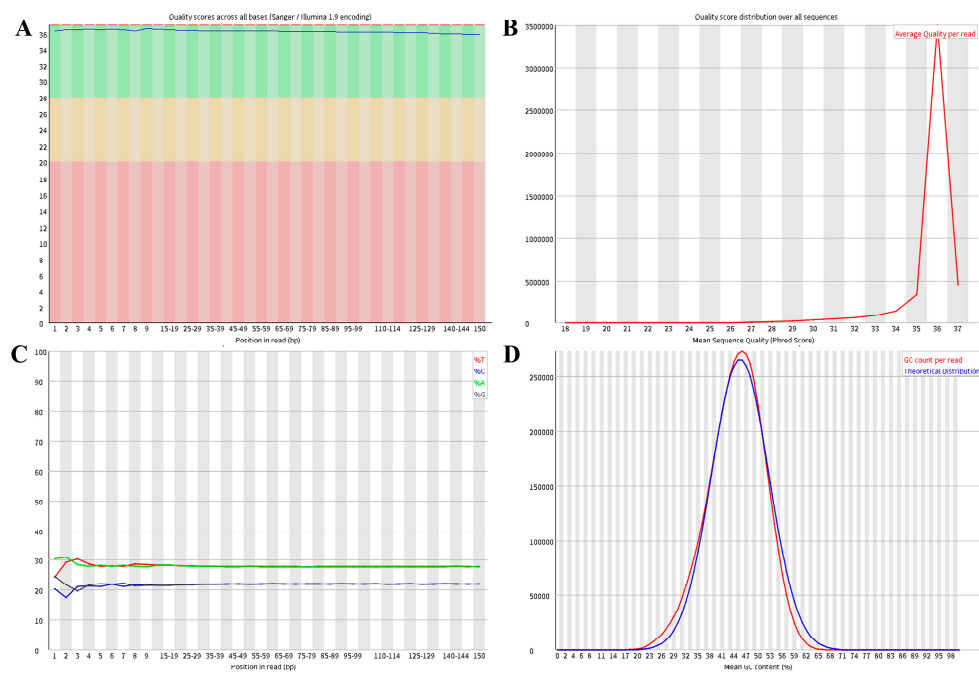

**Figure S1.** Quality control chart of partial next-generation sequencing data. (A) Per base sequence quality; (B) Per sequence quality scores; (C) Per base sequence content; (D) Per sequence GC content, the blue line is the theoretical distribution, whereas the red line is the sample distribution.

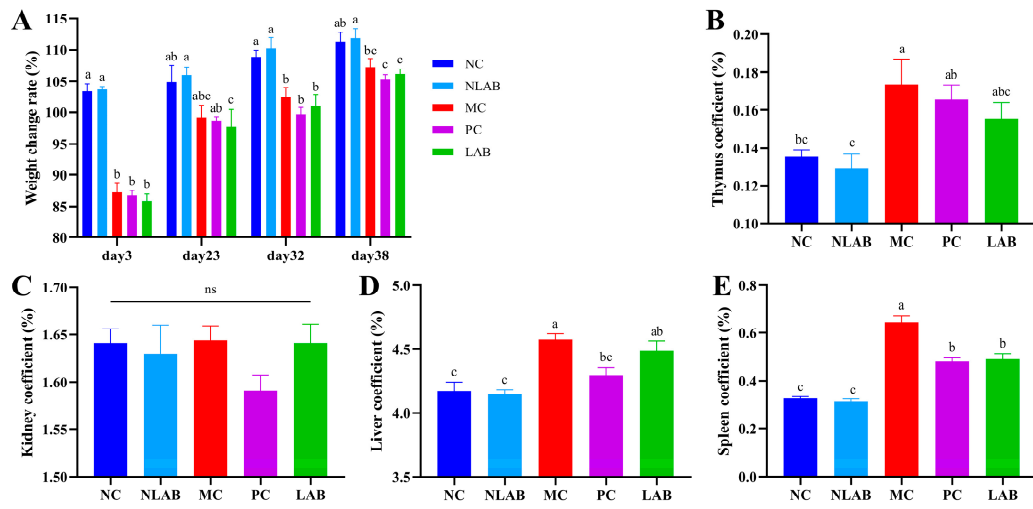

**Figure S2.** Effects of *L. plantarum* YY-112 on BW and organ coefficients. (A) BW; (B) Thymus coefficient; (C) Kidney coefficient; (D) Liver coefficient; (E) Spleen coefficient. NC, normal saline; NLAB,  $1.0 \times 10^9$  CFU/mL *L. plantarum* YY-112; MC, normal saline; PC, 40 mg/kg LMS; LAB,  $1.0 \times 10^9$  CFU/mL *L. plantarum* YY-112.
